# Supplementary material for: Circular RNA cancer vaccines drive immunity in hard-to-treat malignancies
Source: PubMed Central journal article supplement (PMC9475446; doi:10.7150/thno.77350), 2022-08-29
Supplement: thnov12p6422s1.pdf [file thnov12p6422s1.pdf]

## **Circular RNA cancer vaccines drive immunity in hard-to-treat malignancies**

Hongjian Li<sup>1†</sup>, Kun Peng<sup>1†</sup>, Kai Yang<sup>2</sup>, Wenbo Ma<sup>1</sup>, Shaolong Qi<sup>2</sup>, Xinyang Yu<sup>2</sup>, Jia He<sup>3</sup>, Xin Lin<sup>1,4\*</sup>, and Guocan Yu<sup>2\*</sup>

<sup>1</sup>*Institute for Immunology and School of Medicine, Tsinghua University, Beijing 100084, China.*

<sup>2</sup>*Key Laboratory of Bioorganic Phosphorus Chemistry & Chemical Biology, Department of Chemistry, Tsinghua University, Beijing, 100084, China.*

<sup>3</sup>*School of Pharmaceutical Sciences, Tsinghua University, Beijing 100084, China.*

<sup>4</sup>*Tsinghua-Peking Center for Life Sciences, Beijing 100084, China.*

<sup>†</sup>These authors contributed equally to the manuscript.

\* Correspondence:

Guocan Yu ([guocanyu@mail.tsinghua.edu.cn](mailto:guocanyu@mail.tsinghua.edu.cn));

Xin Lin ([linxin307@tsinghua.edu.cn](mailto:linxin307@tsinghua.edu.cn))

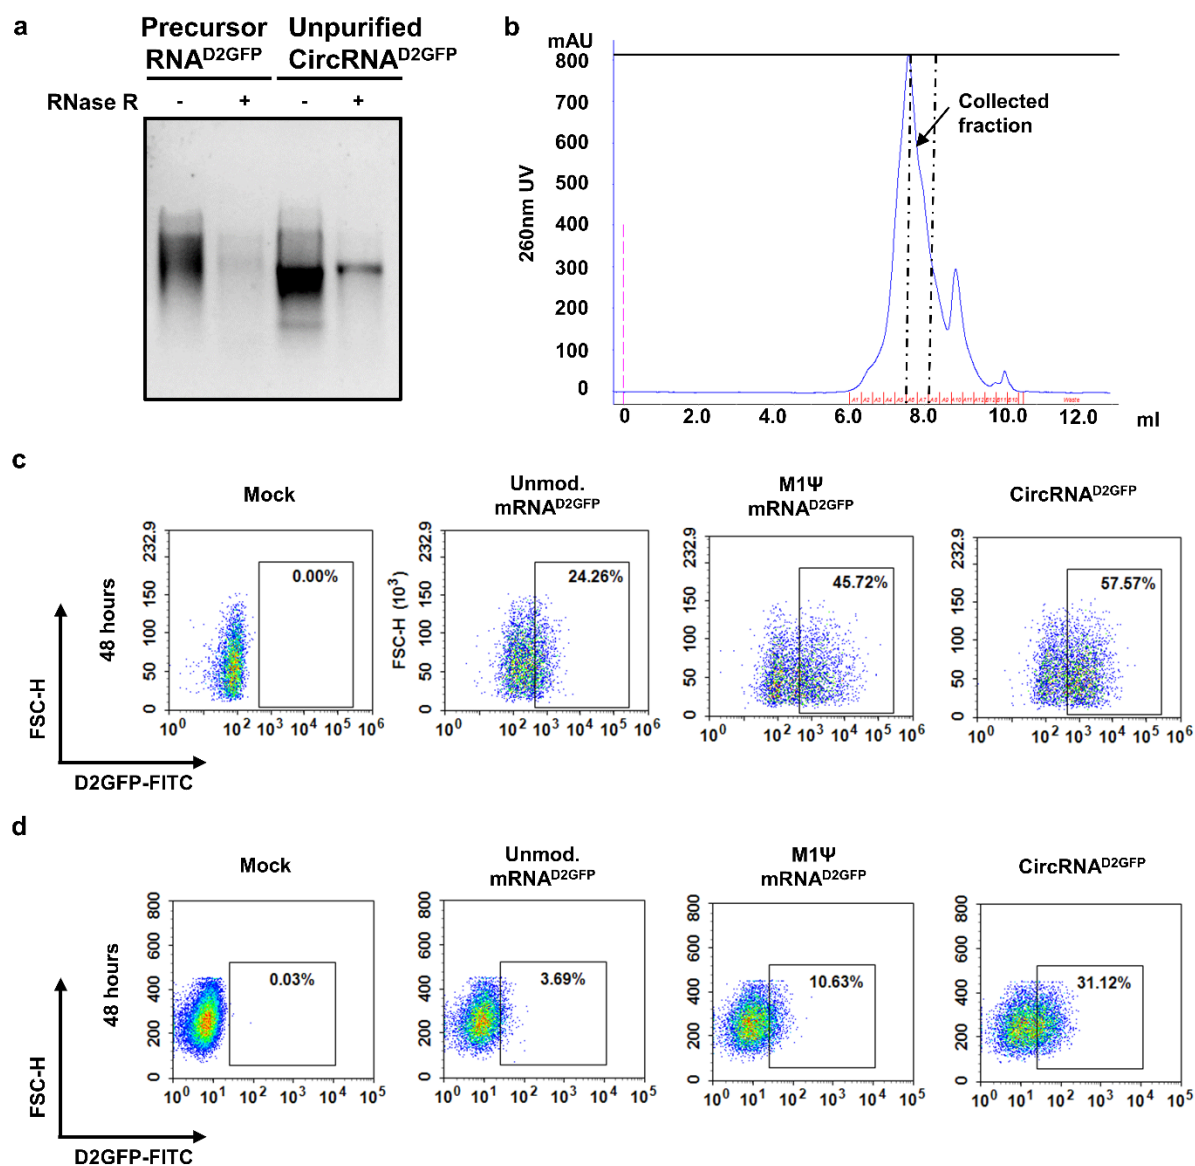

**Figure 1** (a) Agarose gel electrophoresis of D2GFP-coding circRNA precursor (precursor RNA<sup>D2GFP</sup>) and unpurified circRNA (unpurified circRNA<sup>D2GFP</sup>) after RNase R treatment. (b) Chromatogram of D2GFP-coding circRNA<sup>D2GFP</sup> via an AKTA purifier system. Protein expression level of circRNA<sup>D2GFP</sup> and linear RNA<sup>D2GFP</sup> in HEK293T cells (c) and NIH3T3 cells (d) 48 hours after transfection.

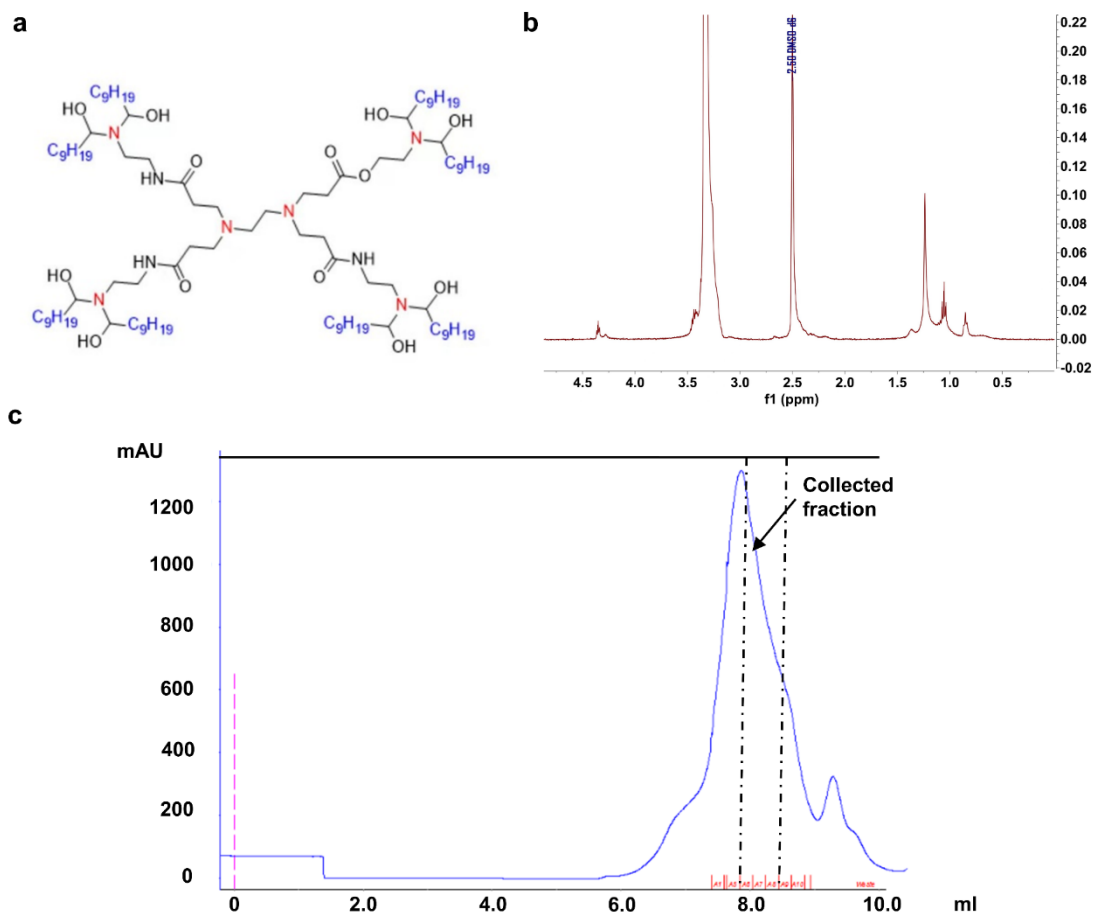

**Figure 2** (a) The molecular structural formula of the novel ionizable lipid. (b) <sup>1</sup>H NMR spectrum of the compound. (c) Chromatogram of OVA (257-264)-luciferase-coding circRNA (circRNA<sup>OVA-luc</sup>) via an AKTA purifier system.

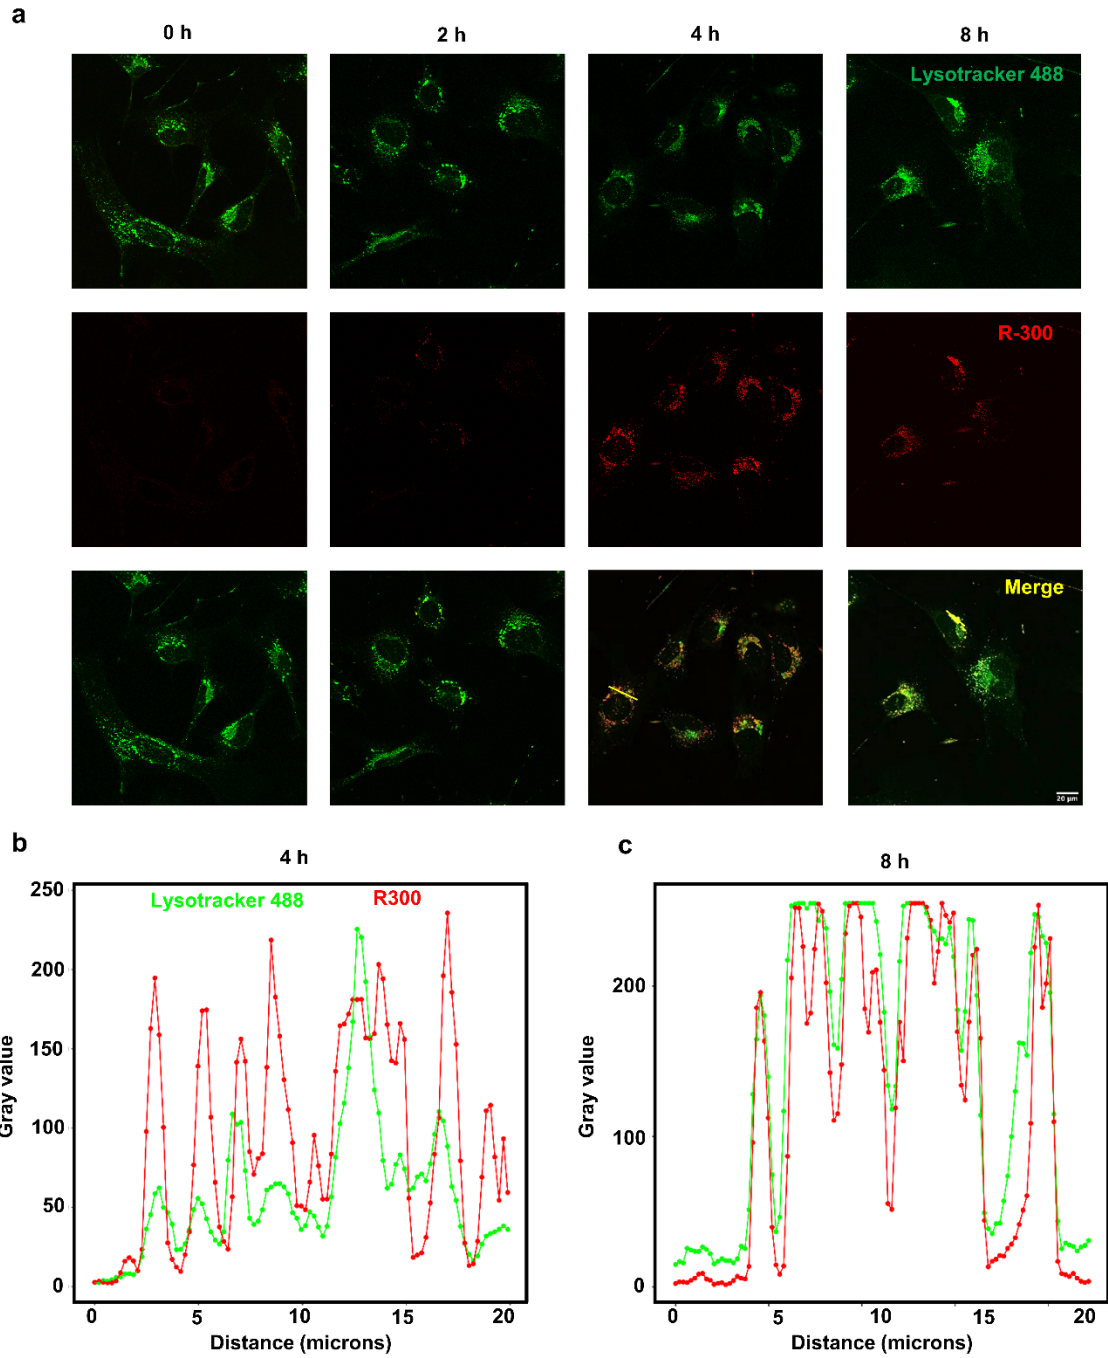

**Figure 3 (a)** Intracellular localization of the LNP and lysosome, characterized by confocal fluorescence microscopic imaging. Red fluorescence dye R300 was encapsulated in LNP and then incubated with mouse embryonic fibroblasts for 0, 2, 4 and 8 hours. Green, Lysotracker 488. Scale bar, 20 $\mu$ m. **(b)** Analysis of the fluorescent value along the selected line (the yellow line) in the merged images.

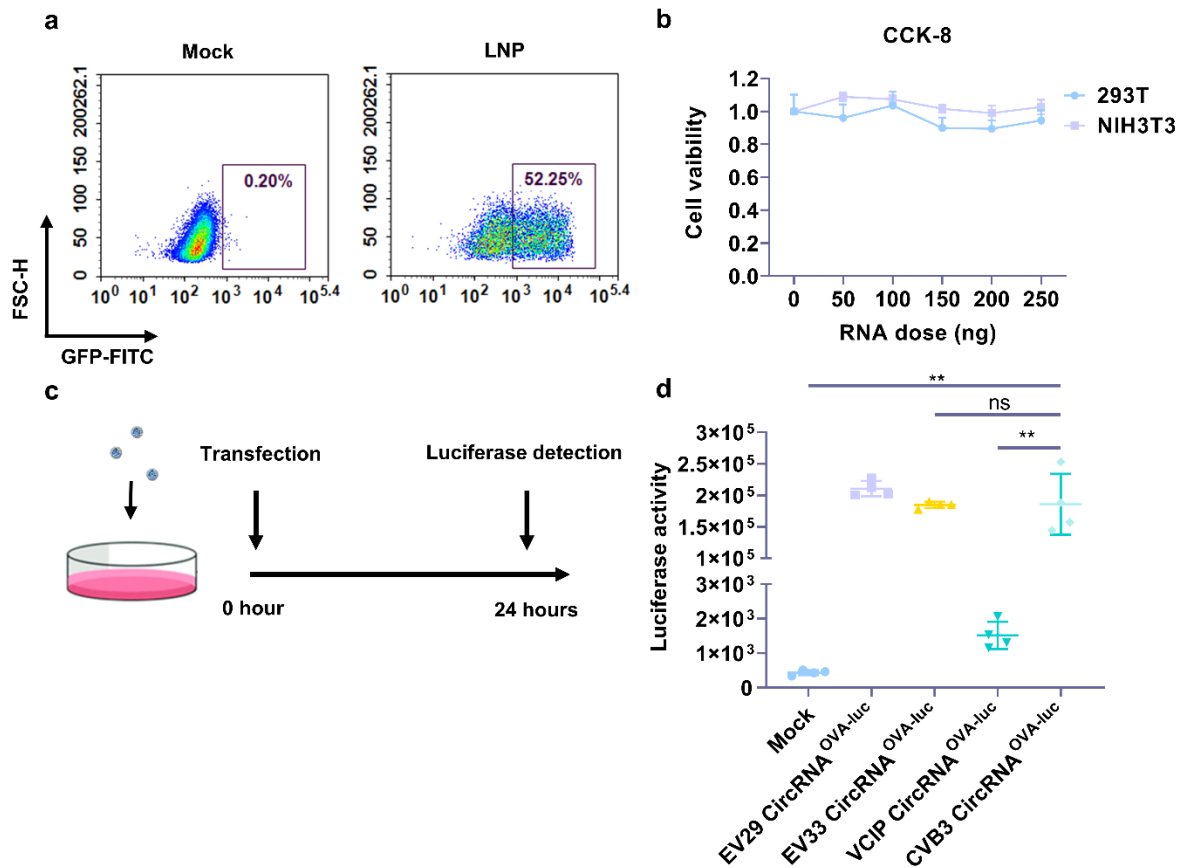

**Figure 4** (a) Flow cytometric analysis of D2GFP expression in HEK293T cells. CircRNA<sup>D2GFP</sup> was encapsulated with LNP for transfection. 24 hours after transfection, cells were harvested for flow cytometry assay. (b) Cell viability after treatment with increasing doses of the circRNA<sup>D2GFP</sup>-LNP complex. Cells were transfected with increasing RNA doses via LNP. After 24 hours, cell viability was evaluated via CCK-8 assay. (c) A workflow of the IRES screening assay in vitro. OVA (257-264)-luciferase-coding circRNA (circRNA<sup>OVA-luc</sup>) with different IRES elements was packaged with LNP and transfected into HEK 293T cells, and luciferase activity was measured 24h after transfection. (d) Statistical analysis of luciferase activity in vitro. ns, no significant, \*\* $p < 0.01$ .

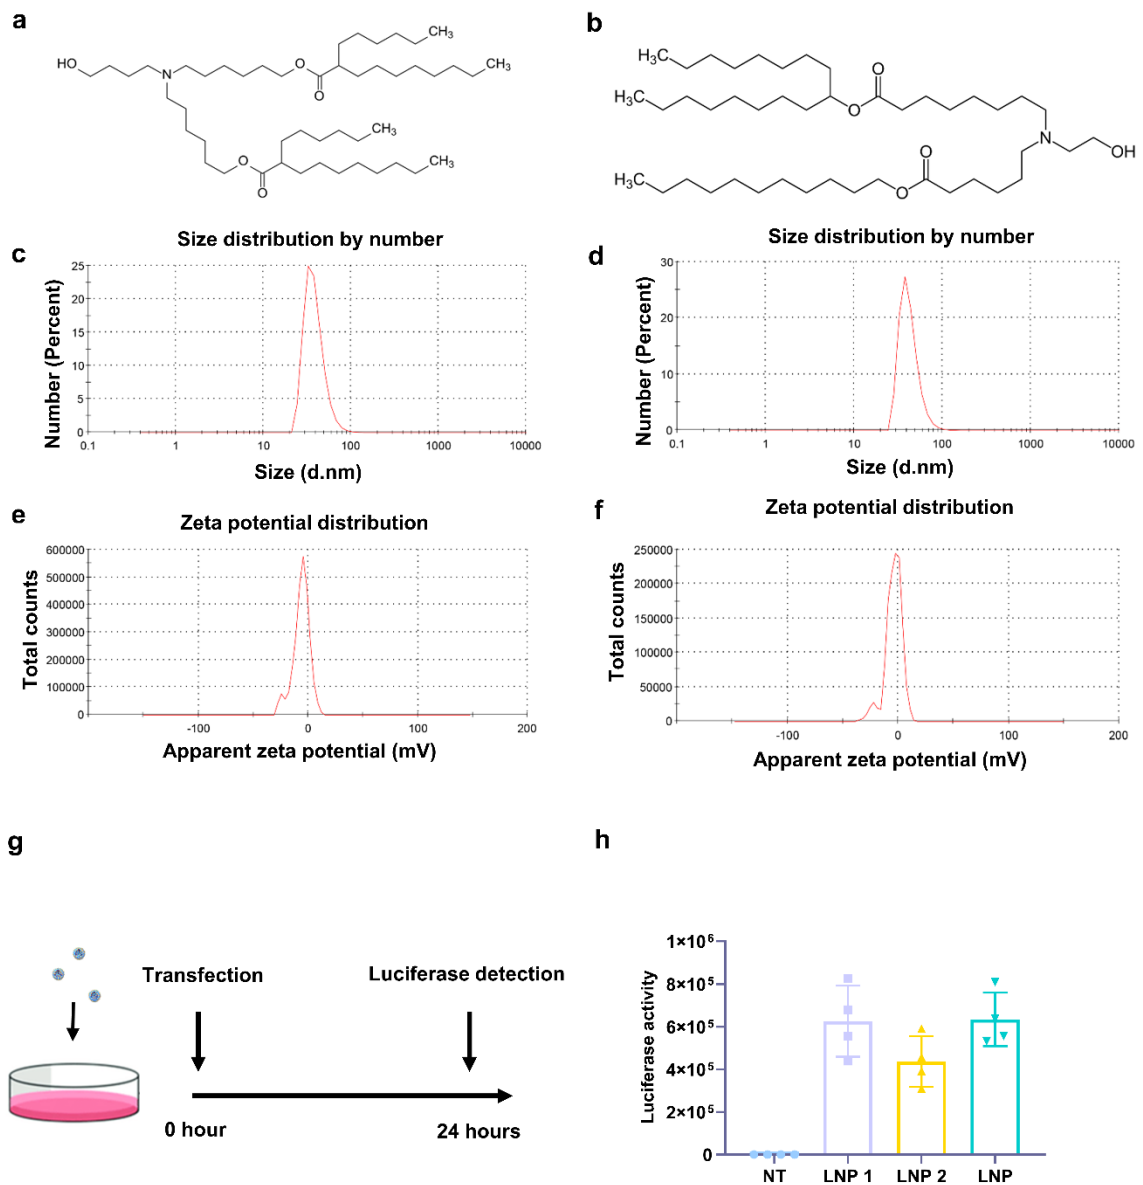

**Figure 5 (a-b)** The molecular structural formula of the two FDA-approved ionizable lipids (a, LNP 1; b, LNP 2). Particle size distributions of the circRNA-LNP 1 (c) and circRNA-LNP 2 (d) complex. Zeta potentials of the circRNA-LNP 1 (e) and circRNA-LNP 2 (f) complex. (g) A workflow of the assay in vitro. OVA (257-264)-luciferase-coding circRNA was encapsulated with different LNPs for transfection. 24 hours after transfection, cells were collected for luciferase activity detection assay. (h) Luciferase activity detection in HEK293T cells.

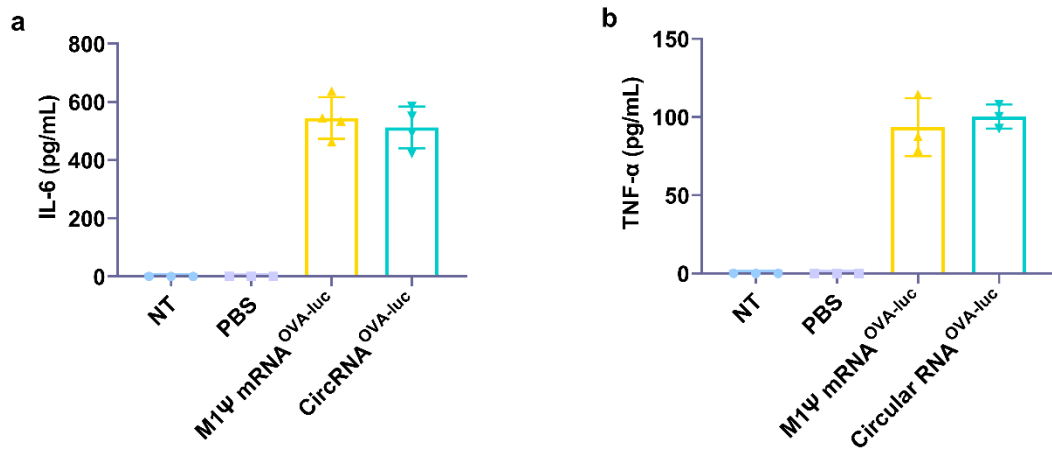

**Figure 6** Comparison of serum cytokine release after RNA-LNP administration in vivo. OVA (257-264)-luciferase-coding circRNA (circRNA<sup>OVA-luc</sup>, 10 μg circRNA per mouse), equimolar amount of M1Ψ mRNA (M1Ψ mRNA<sup>OVA-luc</sup>) and PBS were encapsulated with LNP and intramuscularly administrated. 24 hours later, Elisa assay was carried out to detect serum (a) IL-6 and (b) TNF-α secretion.

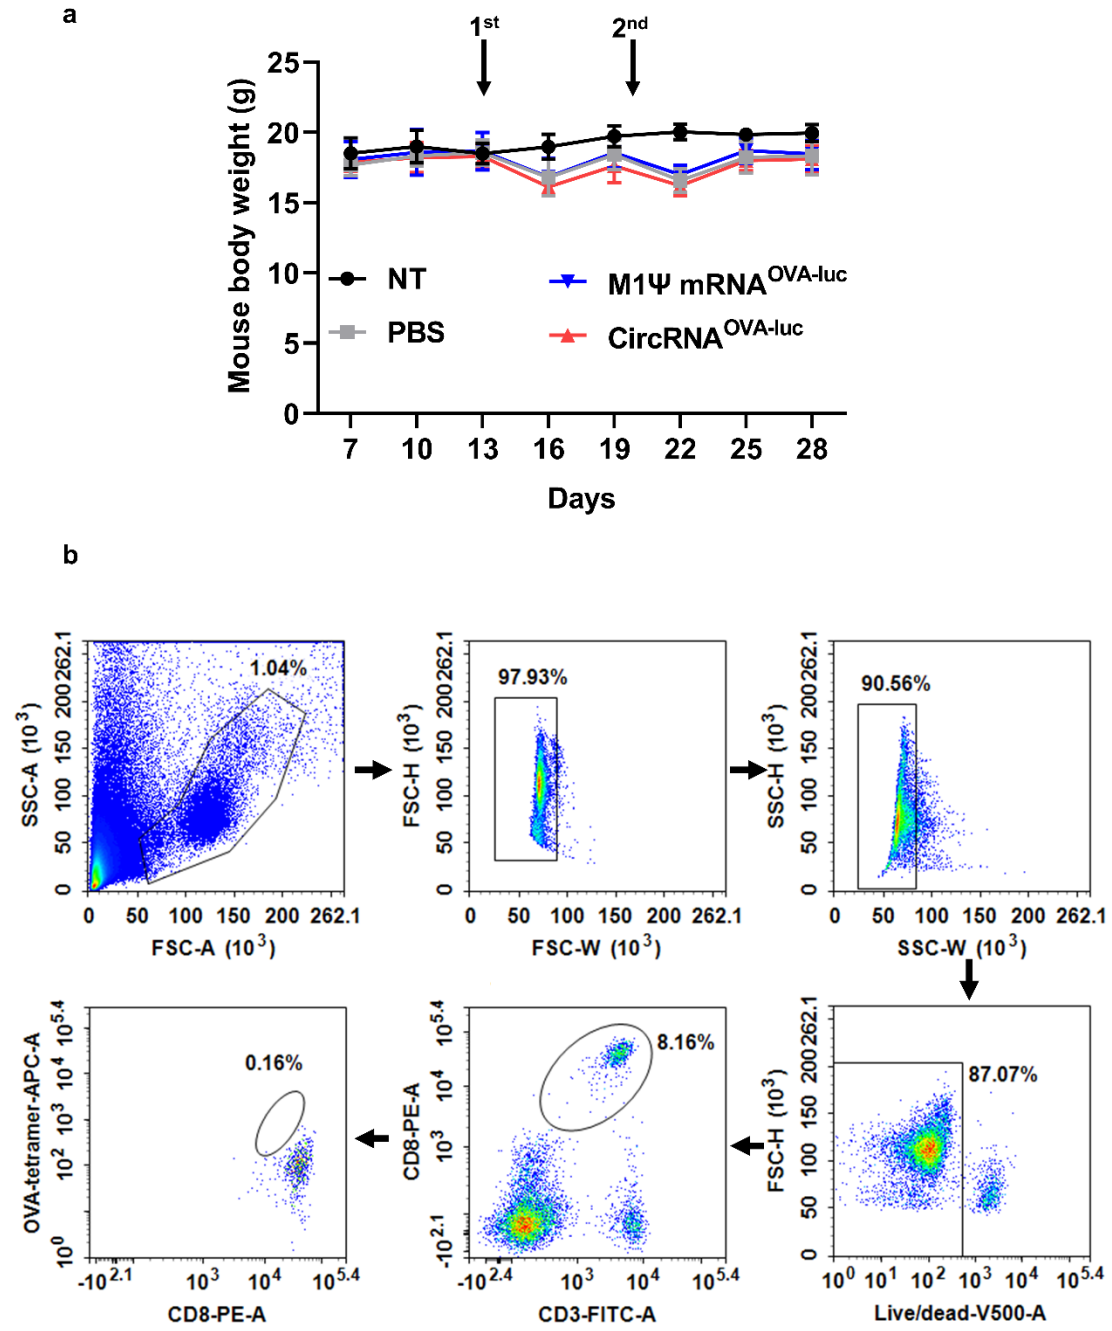

**Figure 7 (a)** Average body weight of the mice in OVA-MC38 tumor model. **(b)** Gating strategy of the flow cytometry data for anti-OVA 257-264 peptide (SIINFEKL) T cell detection in Figure 4C.



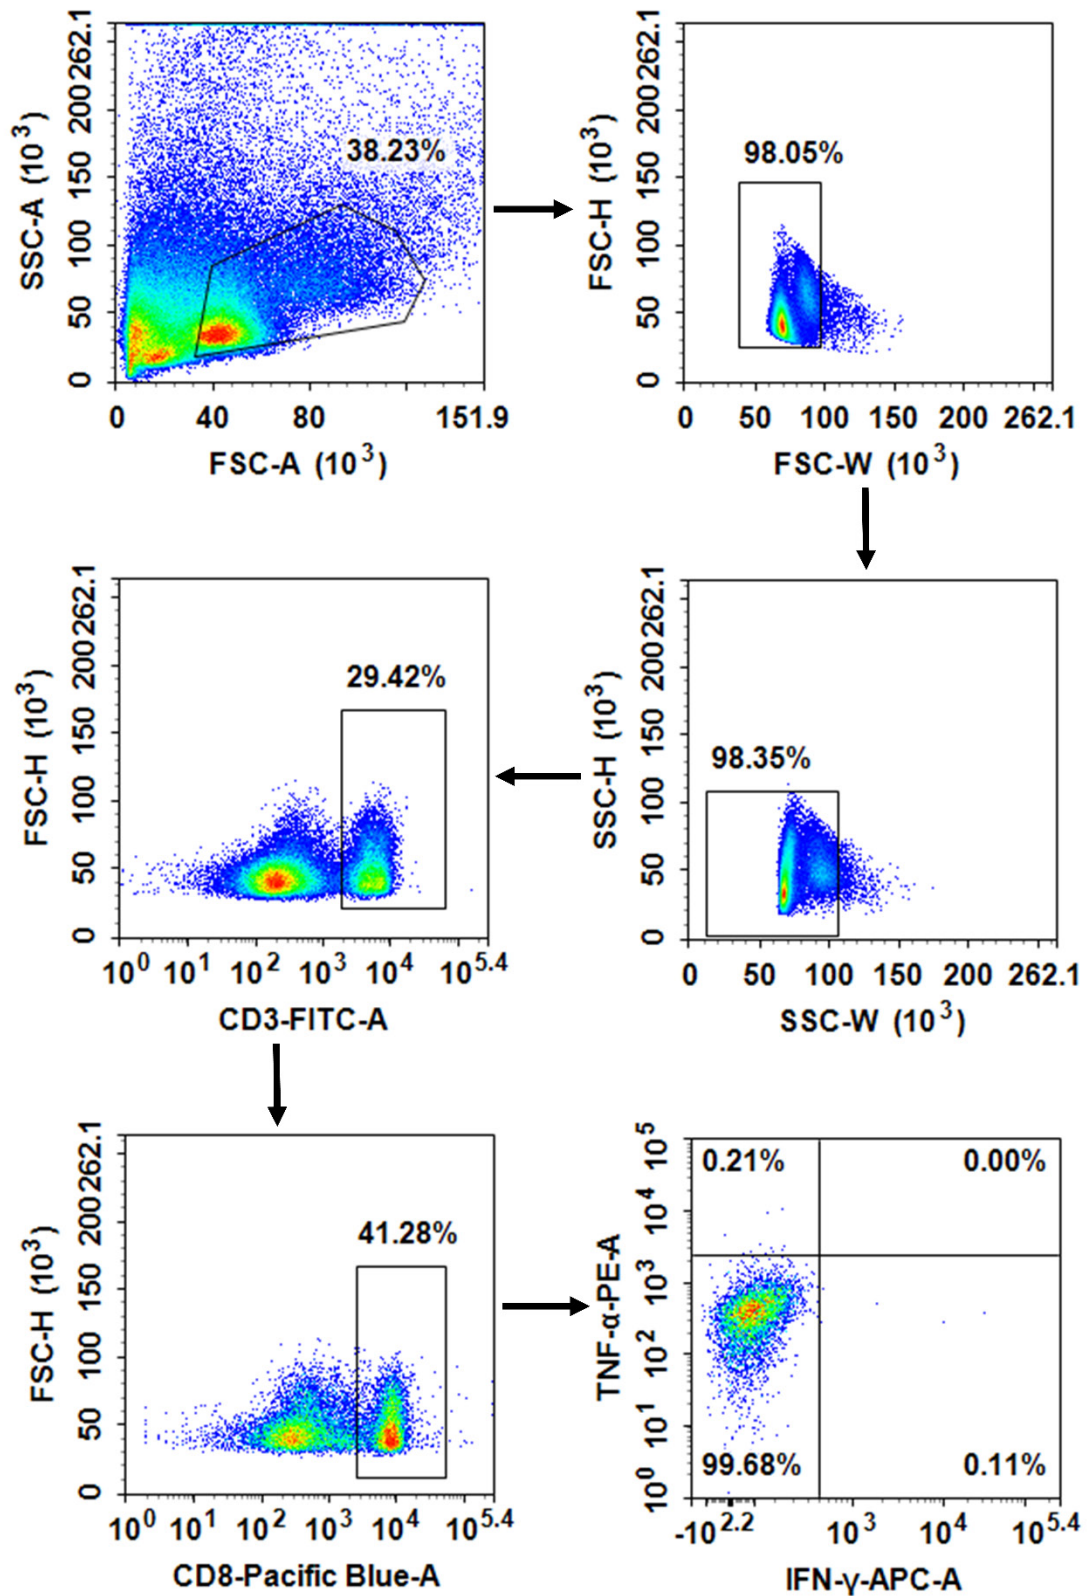

**Figure 8** Gating strategy of the flow cytometry data for detecting the percentage of IFN- $\gamma$  and TNF- $\alpha$  positive CD8<sup>+</sup> T cells in Figure 4E.

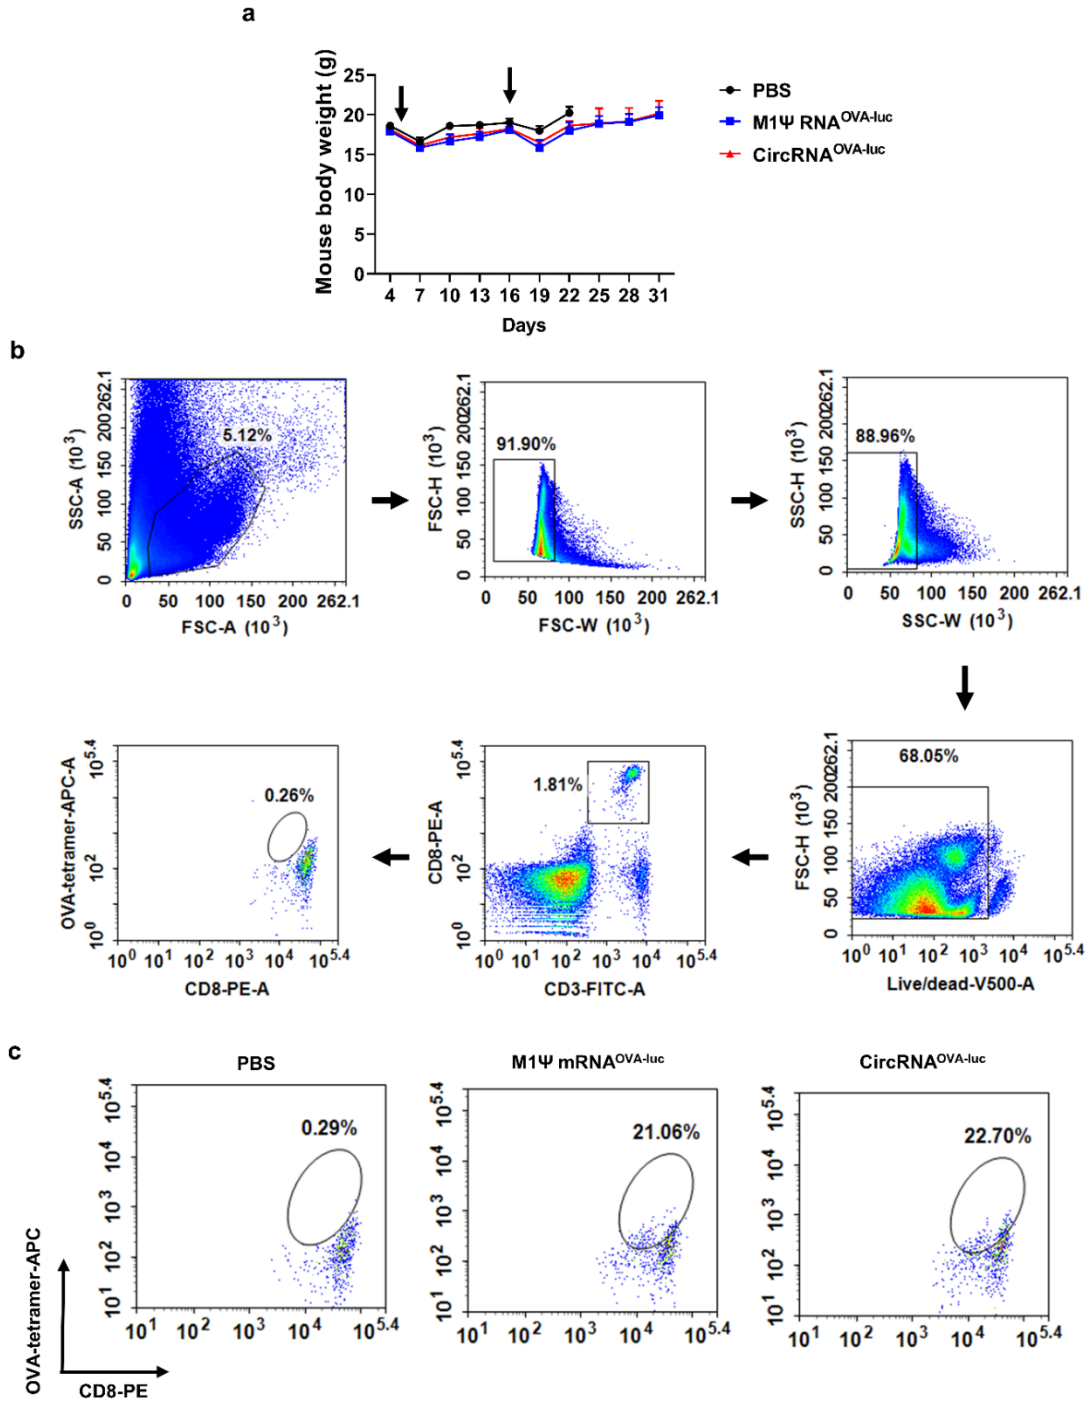

**Figure 9** (a) Average body weight of mice during the experiment of Figure 5A. Gating strategy (b) and representative flow dot plots (c) for anti-OVA 257-264 peptide (SIINFEKL) T cell detection in Figure 5H.

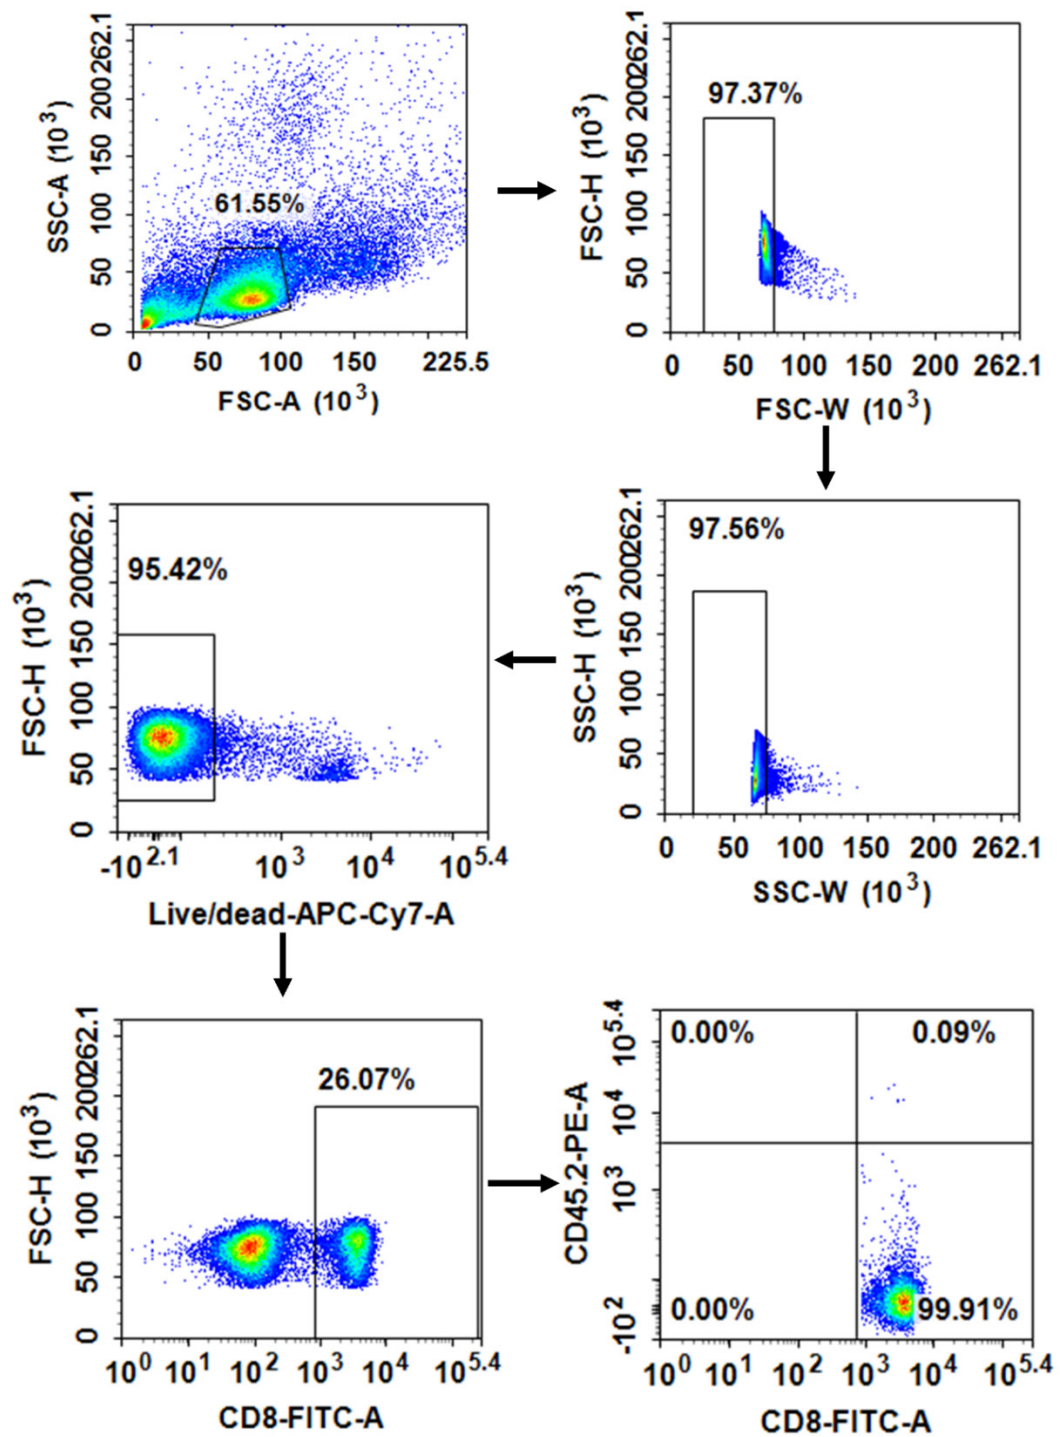

**Figure 10** Gating strategy of the flow cytometry data for detecting the OT-I (CD45.2<sup>+</sup>) T cells in all the CD8<sup>+</sup> cells.

Supplementary Table 1

|                                            |                                                                                                                                                                                                                                                                                                                                                                                                                                                                                                                                                                                                                                                                                                                                                                                                                                                                                                                                                                                                                                                                                                                                                              |
|--------------------------------------------|--------------------------------------------------------------------------------------------------------------------------------------------------------------------------------------------------------------------------------------------------------------------------------------------------------------------------------------------------------------------------------------------------------------------------------------------------------------------------------------------------------------------------------------------------------------------------------------------------------------------------------------------------------------------------------------------------------------------------------------------------------------------------------------------------------------------------------------------------------------------------------------------------------------------------------------------------------------------------------------------------------------------------------------------------------------------------------------------------------------------------------------------------------------|
| <p>Linear<br/>D2GFP RNA<br/>templete</p>   | <p>taatac gactcactatagggaaataagagagaaaagaagagtaagaagaaatataagagccaccgccaccatggtg<br/>agcaagggcgaggagctgttcaccgggggtggtgcccatcctggtcgagctggacggcgacgtaaacggccacaa<br/>gttcagcgtgtccggcgagggcgagggcgatgccacctacggcaagctgacctgaagttcatctgcaccaccgg<br/>caagctgccctgccctggccaccctcgtgaccacctgacctacggcgtgagctgcttcagccgctaccccgac<br/>cacatgaagcagcagcacttctcaagtccgcatgcccgaaggctacgtccaggagcgcaccatcttctcaagga<br/>cgacggcaactacaagaccgcgccgaggtgaagttcagggcgacacctggtgaaccgcatcgagctgaagg<br/>gcatcgactcaaggagcggcaacatcctggggcacaagctggagtacaactacaacagccacaacgtctatat<br/>catggccgacaagcagaagaacggcatcaaggtgaactcaagatccgccacaacatcgaggacggcagcgtgc<br/>agctcgccgaccactaccagcagaacacccccatcggcgacggccccgtgctgctgcccgacaaccactacctga<br/>gcaccagtcgccctgagcaagaccacaagagaagcgcgatcacatggtcctgctggagttcgtgaccgccg<br/>ccgggatcactctcgcatggacgagctgtacaagaagcttagccatggcttcccgggaggtggaggagcagg<br/>atgatggcacgctgccatgtctgtgccaggagcgggatggaccgtcacctgcagcctgtcttctgtagg<br/>atcaatgtgtaggctgccttctcggggctgaccttggccatgcccttcttctccttgcacctgtaccttggctt<br/>tgaataaagcctgagtaggaagt</p>                                                                       |
| <p>Circular<br/>D2GFP RNA<br/>templete</p> | <p>taatac gactcactatagggggagaccctcgaccgtcgattgtccactggtcaacaatagatgacttacaactaatcgg<br/>aaggtgcagagactcgacgggagctaccctaactcaagacgagggtaaaagagagagtgcaattctcaaagccaat<br/>aggcagtagcgaagctgcaagagaatgaaatccgttgacctaaacggctggtgggttaagtcctccacccc<br/>cacgccggaaacgcaatagccgaaaaacaaaaacaaaaaaacaaaaaaacaaaaaaacaaacacatct<br/>agattaaaacagcctgtgggtgatcccaccacaggccattgggcgctagcactctggtatcacggtacctttgtg<br/>gcctgtttatccccctccccaaactgtaacttagaagtaacacacaccgatcaacagtcagcgtggcacaccagcc<br/>acgtttgatcaagcacttctgttaccgggactgagtatcaatagactgctcacggtgaaggagaaaagcgttcgtt<br/>atccggccaactactcgaaaaacctagtaacaccgtggaagttgcagagtgttcgctcagcactaccagtgtag<br/>atcagtcgatgagtcaccgattccccaggcgaccgtggcgggtgctgcttggcggcctgccatggggaa<br/>accatgggacgctctaatacagacatggtgcgaagagtctattgagctagttgtagtctccggcccctgaatgcg<br/>gctaactcactcgggagcacacacctcaagccagagggcagtggtcgtaacgggcaactctgcagcggaaacc<br/>gactactttgggtgccgtgttctttattctatactggctgcttatggtgacaattgagagatcgttaccatagctatt<br/>ggattggccatccggtgactaataagagctattatatacccttgggtttataccacttagcttgaagagggttaaac<br/>attacaattcattgtaagttgaatacagcaaatggtgagcaagggcgaggagctgttcaccgggggtggtgccatc</p> |

|                                                                                                |                                                                                                                                                                                                                                                                                                                                                                                                                                                                                                                                                                                                                                                                                                                                                                                                                                                                                                                                                                                                                                                                                                                                                                                                                                                                 |
|------------------------------------------------------------------------------------------------|-----------------------------------------------------------------------------------------------------------------------------------------------------------------------------------------------------------------------------------------------------------------------------------------------------------------------------------------------------------------------------------------------------------------------------------------------------------------------------------------------------------------------------------------------------------------------------------------------------------------------------------------------------------------------------------------------------------------------------------------------------------------------------------------------------------------------------------------------------------------------------------------------------------------------------------------------------------------------------------------------------------------------------------------------------------------------------------------------------------------------------------------------------------------------------------------------------------------------------------------------------------------|
|                                                                                                | <p>ctggtcagactggacggcgacgtaaacggccacaagttcagcgtgtccggcgagggcgagggcgatgccaccta<br/> cggcaagctgacctgaagttcatctgcaccaccggcaagctgcccgtgccctggcccacctctgaccacctg<br/> acctacggcgtgcagtgttcagccgtaccccaccacatgaagcagcacgacttctcaagtcgccatgccga<br/> aggctacgtccaggagcgcaccatcttctcaaggacgacggcaactacaagaccggcgccgaggtgaagttcga<br/> ggggcaccacctggtgaaccgcatcagctgaaggcgcactcaaggaggacggcaacatctggggcaca<br/> agctggagtacaactacaacagccacaacgtctatatcatggccgacaagcagaagaacggcatcaaggtgaact<br/> caagatccgccacaacatcgaggacggcagcgtgcagctcggcaccactaccagcagaacacccccatcggcg<br/> acggccccgtgctgctgcccgacaaccactacctgagcaccagtcgccctgagcaaagacccccaacgagaagc<br/> cgatcacatggtcctgctggagttcgtgaccgccgggatcactctcggcatggcagcgtgtacaagaagctt<br/> agccatggctcccgggaggtggaggagcaggatgatggcagcgtgccatgtcttggccaggagagcggg<br/> atggaccgtcacctgcagcctgtgcttctgtaggatcaatgttaggtcgacaaaaaacaaaaaacaaacggcta<br/> ttatgcftaccggcagacgctacggactaaataattgacctaagaagaattcttaagtgatgctctcaact<br/> cagggaacctaatactagttatagacaaggcaatcctgagccaagccgaagtagtaattagtaagaccagtgaca<br/> atcgacggataacagcatatctag</p>                                                                                                                                                                     |
| <p>Circular<br/> OVA<br/> (257-264;<br/> SIINFEKL)-<br/> luciferase<br/> RNA<br/> templete</p> | <p>taatacactcactatagggggagacctcgaccgtgattgtccactggtcaacaatagatgacttacaactaatcgg<br/> aaggtgcagagactcgacgggagctaccctaacgtcaagacgagggtaaagagagagtccaattctcaaagccaat<br/> aggcagtagcgaagctgcaagagaatgaaaatccgttgaccttaaacggcgtgtgggttaagtcctccacccc<br/> cacgccggaacgcaatagccgaaaaacaaaaacaaaaaacaaaaaaccccccaaaaaacaaaacacatct<br/> agattaaaacagcctgtgggtgatccccccacagccattgggcgctagcactctggtatcacggtacctttgtgc<br/> gcctgtttatacccctcccccaactgtaacttagaagtaacacacaccgatcaacagtcagcgtggcacaccagcc<br/> acgtttgatcaagcacttctgttccccggactgagtatcaatagactgctcacgcggtgaaggagaaagcgttcgtt<br/> atccggccaactacttcgaaaaacctagtaacaccgtggaagttgcagagtggttcgctcagcactaccctagtag<br/> atcaggtcgtgagtcaccgcattccccacggcgaccgtggcgggtgctgcgttggcggcctgccatggggaa<br/> acctatgggacgcttaatacagacatggtgcgaagagtctattgagctagttgtagtctccggcccctgaatgcg<br/> gctaacttaactcgggagcacacacctcaagccagaggcagtggtcgtaacgggcaactctgcagcggaaacc<br/> gactacttgggtgtccgtgttctttatcttatactggctgcttatgggtgacaattgagagatcgttaccatagctatt<br/> ggattggccatccggtgactaatagactattatataccctttgttgggtttataccacttagcttgaagaggttaaac<br/> attacaattcattgtaagttgaatacagcaaatgctgagcagcttgagagtataatcaacttgaaaaactgactgaat<br/> ggaccagtggggatccaccggtcatggaagacgcaaaaacataaagaaggccggccattctatccgctgg</p> |

|                                                                                         |                                                                                                                                                                                                                                                                                                                                                                                                                                                                                                                                                                                                                                                                                                                                                                                                                                                                                                                                                                                                                                                                                                                                                                                                                                                                                                                                                                                                                                                                                                                                                                                                                                                                                                                                                                                                                                                                                                                                    |
|-----------------------------------------------------------------------------------------|------------------------------------------------------------------------------------------------------------------------------------------------------------------------------------------------------------------------------------------------------------------------------------------------------------------------------------------------------------------------------------------------------------------------------------------------------------------------------------------------------------------------------------------------------------------------------------------------------------------------------------------------------------------------------------------------------------------------------------------------------------------------------------------------------------------------------------------------------------------------------------------------------------------------------------------------------------------------------------------------------------------------------------------------------------------------------------------------------------------------------------------------------------------------------------------------------------------------------------------------------------------------------------------------------------------------------------------------------------------------------------------------------------------------------------------------------------------------------------------------------------------------------------------------------------------------------------------------------------------------------------------------------------------------------------------------------------------------------------------------------------------------------------------------------------------------------------------------------------------------------------------------------------------------------------|
|                                                                                         | <p>aagatggaaccgctggagagcaactgcataaggctatgaagagatacgcctggtcctggaacaattgcttttacag<br/> atgcacatacagagtgacatcacttacgctgagtactcgaatgtccgttcggtggcagaagctatgaaacgata<br/> tgggctgaatacaaatcacagaatcgtcgtatgcagtgaaaactcttcaattctttatgccgggtgtgggcgcgtattt<br/> atcggagttgcagttgcgccgcgaacgacattataatgaacgtgaattgctcaacagatgggcatttcgacgcta<br/> ccgtggtgttcgttccaaaagggtgcaaaaaatttgaacgtgcaaaaaagctccaatcatcaaaaaattatt<br/> atcatggattctaaacggattaccagggatttcagtcgatgtacacgttcgacatctcatctacctcccgtttaatg<br/> aatacattttgtccagagtccttcgataggacaagacaattgactgatcatgaactcctctggatctactggtctg<br/> cctaaagggtgcgctcgcctcatagaactgcctgcgtgagattctcgcagatccagatcctattttggcaatcaaatc<br/> attccggatactgcgattttaagtgtttcattccatcacggttttgaatgttactacactcggatattgatgtggat<br/> ttcagtcgtcttaatgatagattgagaagagctgtttcaggagccttcaggattacaagattcaagtgcgctgc<br/> tgggtccaaccctattctcttccgcaaaagcactctgattgacaatacattatctaatctacacgaaattgcttct<br/> gggtggcgtcccctcttaaggaagtcggggaagcgggtccaagaggtccatctgcaggtatcaggcaaggat<br/> atgggctcactgagactacatcagctattctgattaccccagggggatgataaacgggcgcggtcgtaagtt<br/> gttccatttttgaagcgaaggtgtggatctggataccgggaaaacgctgggcgtaatacaagaggcgaactgtgtg<br/> tgagaggtcctatgattatgtccggtatgtaacaatccggaagcgaccaacgccttgattgacaaggatggatggct<br/> acattctggagacatagcttactgggacgaagacgaacacttctcatcgttgaccgcctgaagtctctgattaagtaca<br/> aaggctatcaggtggctcccgtgaattggaatccatcttctccaacaccccaacatcttcgacgcaggtgtcgcag<br/> gtcttcccacgatgacgccggtgaactcccgcgccgttgtgtttggagcacggaaagacgatgacggaaaaa<br/> gagatcgtggattacgtgccagtcagtaacaaccgcgaaaaagtgcgaggaggtgtgtttgtggacgaagt<br/> accgaaaggtcttaccggaaaactgacgcaagaaaaatcagagagatcctcataaaggccaagaagggcggaaa<br/> gatgccgtgtgagtcgacaaaaacaaaaacaaacggctattatgcgttaccggcgagacgctacggactaaa<br/> taattgagcctaaagaagaaattcttaagtggatgctctcaaacctagggaacctaaatctagttatagacaaggca<br/> atcctgagccaagccgaagtagtaattagtaagaccagtggacaatcagcgataacgacatatctag</p> |
| <p>Linear OVA<br/> (257-264;<br/> SIINFEKL)-<br/> luciferase<br/> RNA<br/> templete</p> | <p>taatacactcactatagggaaataagagagaaaagaagagtaagaagaatataagaccaccgccaccatgctt<br/> gagcagcttgagagtataatcaactttgaaaactgactgaatggaccagtggggatccaccggtcatggaagacgc<br/> caaaaacataaagaaggcccggcgcattctatccgctggaagatggaaccgctggagagcaactgcataaggct<br/> atgaagagatacgcctggtcctggaacaattgctttacagatgcacatacagagtgacatcacttacgctgagta<br/> cttcgaaatgtccgttcggtggcagaagctatgaaacgatatgggctgaatacaaatcacagaatcgtcgtatgcag<br/> gaaaactcttcaattctttatgccggtgtgggcgcgttattatcggagttgcagttgcgccgcgaacgacattata</p>                                                                                                                                                                                                                                                                                                                                                                                                                                                                                                                                                                                                                                                                                                                                                                                                                                                                                                                                                                                                                                                                                                                                                                                                                                                                                                                                                                                                                           |

|                       |                                                                                                                                                                                                                                                                                                                                                                                                                                                                                                                                                                                                                                                                                                                                                                                                                                                                                                                                                                                                                                                                                                                                                                                                                                                                                                                                                                                                                                                                                                 |
|-----------------------|-------------------------------------------------------------------------------------------------------------------------------------------------------------------------------------------------------------------------------------------------------------------------------------------------------------------------------------------------------------------------------------------------------------------------------------------------------------------------------------------------------------------------------------------------------------------------------------------------------------------------------------------------------------------------------------------------------------------------------------------------------------------------------------------------------------------------------------------------------------------------------------------------------------------------------------------------------------------------------------------------------------------------------------------------------------------------------------------------------------------------------------------------------------------------------------------------------------------------------------------------------------------------------------------------------------------------------------------------------------------------------------------------------------------------------------------------------------------------------------------------|
|                       | <p>atgaacgtgaattgctcaacagtatggcatttcgcagcctaccgtggtgttcgttccaaaaggggtgcaaaaatt<br/> ttgaacgtgcaaaaaagctcccaatcatcaaaaaattattatcatggattctaaaacggattaccagggttccagtc<br/> gatgtacacgttcgtcacatctcatctacctcccggtttaataacagatgttccagagtccttcgatagggacaa<br/> gacaattgcactgatcatgaactcctctggatctactggctctgcctaaagggtgcctctgcctcatagaactgcctgcg<br/> tgagattctcgcatgccagagatcctattttggcaataaatcattccggatactgcgatttaagtgtgttccattccat<br/> cacggtttggatgttactacactcggatattgatatgtggatttcgagtcgtctaatgfatagattgaagaagagct<br/> gtttctgaggagcctcaggattacaagattcaaatgctgctgtggtgccaacctattctcttcttcgcaaaaagca<br/> ctctgattgacaaatacgattatctaatttacacgaaattgcttctggtggcgtcccctcttaaggaagtggggaag<br/> cggttgccaagaggttccatctgccaggtatcaggcaaggatagggctcactgagactacatcagctattctgattac<br/> acccgaggggatgataaacgggcggtggtgaaagtgttccatttttgaagcgaaggtgtggtctggatac<br/> cgggaaaacgctgggcgttaatacaagaggcgaactgtgtgtgagaggtcctatgattatgtccggtatgtaacaat<br/> ccggaagcgaccaacgccttgattgacaaggtggtgctacattctggagacatagcttactgggacgaagacg<br/> aacacttctcatcgtgaccgctgaagtctctgattaagtacaaaggctatcaggtggctcccgtgaattggaatcc<br/> atcttctccaacacccaacatcttcgacgcaggtgtcgcaggtctcccacgatgacgccggtgaactcccgc<br/> gccgtgtgttttggagcacggaagacgatgacggaaaagagatcgtggattacgtgccagtcaagtaaac<br/> cgcaaaaagtgcgaggagggtgtgttggacgaagtaccgaaagtctaccgaaaactcgacgcaaga<br/> aaaatcagagagatcctataaaggccaagaaggcggaagatcgccgtgaagctgccttctgcgggcttgc<br/> ttctggccatgccttctctccttgcacctgtaccttctgttgaataaacctgagtaggaagt</p> |
| CVB3 IRES<br>templete | <p>ttaaacagcctgtgggtgatcccacccacaggccattgggcgctagcactctggtatcacggtaccttctgtcgc<br/> tgtttataccccctccccactgtaactagaagtaacacacaccgatcaacagtcagcgtggcacaccagccagct<br/> ttgatcaagcacttctgttaccggactgagtatcaatagactgctcacgcggtgaaggagaaagcgttctgtatcc<br/> ggccaactactcgaaaaactagtaacaccgtggaaggtgcagaggtttcgtcagcactaccctagtagatca<br/> ggtcgtgatgacaccgattcccacgggcgaccgtggcgggtgctgctggtggcggcctgccatggggaacc<br/> atgggacgctctaatacagacatggtgcgaagagtctattgagctagttgtagtctccggcccctgaatgcggcta<br/> atcctaactcggagcacacacctcaagccagaggcagtggtcgtaacgggcaactctgcagcgggaaccgact<br/> acttgggtgtccgtttcttttcttactggctgcttatggtgacaattgagagatcgttaccatagctattgga<br/> ttggccatccggtgactaatagagctattatatacccttgttgggttataccacttagcttgaagaggttaaacatta<br/> caattcattgtaagtgaatacagcaaa</p>                                                                                                                                                                                                                                                                                                                                                                                                                                                                                                                                                                                                                                                                                                           |
| EV33 IRES             | <p>ttaaacagcctgtgggtgatcccacccacaggccattgggcgctagcactctggtatcacggtaccttctgtcgc</p>                                                                                                                                                                                                                                                                                                                                                                                                                                                                                                                                                                                                                                                                                                                                                                                                                                                                                                                                                                                                                                                                                                                                                                                                                                                                                                                                                                                                              |

|                       |                                                                                                                                                                                                                                                                                                                                                                                                                                                                                                                                                                                                                                                                                                                                                                                                                         |
|-----------------------|-------------------------------------------------------------------------------------------------------------------------------------------------------------------------------------------------------------------------------------------------------------------------------------------------------------------------------------------------------------------------------------------------------------------------------------------------------------------------------------------------------------------------------------------------------------------------------------------------------------------------------------------------------------------------------------------------------------------------------------------------------------------------------------------------------------------------|
| templete              | <p>cctgtttatgtcccttccctcaactgtaacttagaagtaacgcacaccgatcaacagtcagcgtggcacaccagccat</p> <p>gtttgatcaagcacttctgttaccggaccgagatcaacagactgctcacgcggtgaaggagaaagtgtcgttat</p> <p>ccggccaactacttcgaaaaactagtaacaccatggaagttgcagagtgttcgctcagcactaccagtgtagat</p> <p>caggtcgatgagtcaccgcacccccacggcgaccgtggcgggtggctgcgttggcggcctgctatgggggaac</p> <p>ccataggacgctctaatacagacatggtgcgaagagtccattgagctagttgtagtctccggcccctgaatgcggc</p> <p>taatcctaactgcggagcacacacttcaagccagagggcagtggtgcgtaacgggcaactctgcagcggaaaccga</p> <p>ctactttgggtgccgtgtttcattttattctatactggctgcttatggtgacaattgagagattgtaccatatactattgg</p> <p>attggccatccagtgactagcagagctattatataccttctgttgggttataaccacctaattgaaagaagttaaacatt</p> <p>agaattcattataaattgaataca</p>                                                                                     |
| EV29 IRES<br>templete | <p>ttaaaacagcctgtgggtgatcccaccacagggcccactgggcgctagcactctggatcacggtacctttgtcgcg</p> <p>cctgtttatacttctcccccaactgcaacttagaagtaacacaaccgatcaacagtcagcgtggcacaccagccac</p> <p>gtttgatcaaacacttctgttaccggactgagatcaatagactgctcacgcggtgaaggagaaaacgttcgttat</p> <p>ccggccaactacttcgagaaactagtaacgccatggaagttgtggagtgttcgctcagcactaccagtgtagat</p> <p>caggtgatgagtcaccgcattccccacgggtgaccgtggcgggtggctgcgttggcggcctgcccattggggaaacc</p> <p>catgggacgctctatacagacatggtgcgaagagtctattgagctagttgtagtctccggcccctgaatgcggcta</p> <p>atcccaactgcggagcatacactctcaagccagagggtagtgctgtaatgggcaactctgcagcggaaaccgacta</p> <p>ctttgggtgccgtgtttcattttattctatactggctgcttatggtgacaattgagagattgtaccatatactattggatt</p> <p>ggccatccggtgactaacagagctattatatacttttgggttataaccacttagctgaaagaggttaaaacttaca</p> <p>ttacattttaactgaacaccgcaaa</p> |
| VCIP IRES<br>templete | <p>gacctcgtgaaataaaagtgcagaaaacaaccagcgatcacagcagcagccgccggcagcagcaccaaac</p> <p>agcaggaggagcaggaggagccggaggaggaggaggaggaggaggcaaagttagagttggggctggcgtcc</p> <p>ggagttgctgggctcagcgcagctcccattcattaaggaaccagctgcggaggaaggtggccgagcggcgcgt</p> <p>gcccactcgtcgtcgcgcactcagacgcgcgccacaacagcgcgccccaaagctgcgcagctctgaaaagtctc</p> <p>tgctcgggatctggctctctccccttgactttagaacgatttagggtgacagaggaaagcagaggcgcgaggag</p> <p>gagcagaaaacaccaccttctgcagttggaggcaggcagccccggctgactctagccgccgcccggagccg</p> <p>gggccgaccggcactatccgcagcagcctggccaggaggcagccggcgcctgggtgtgtggctgctgttgc</p> <p>gggacgtcttcgggggcggaggctcgcgccgagccagcgc</p>                                                                                                                                                                                         |
| T7 promoter           | TAATACGACTCACTATAGGG                                                                                                                                                                                                                                                                                                                                                                                                                                                                                                                                                                                                                                                                                                                                                                                                    |
| 5'UTR                 | AAATAAGAGAGAAAAGAAGAGTAAGAAGAAATATAAGAGCCACC                                                                                                                                                                                                                                                                                                                                                                                                                                                                                                                                                                                                                                                                                                                                                                            |



|       |                                                                                                    |
|-------|----------------------------------------------------------------------------------------------------|
| 3'UTR | GCTGCCTTCTGCGGGGCTTGCCTTCTGGCCATGCCCTTCTTCTCTCCCTT<br>GCACCTGTACCTCTTGGTCTTTGAATAAAGCCTGAGTAGGAAGT |
|-------|----------------------------------------------------------------------------------------------------|
